# Supplementary material for: Cyclodextrin as Functional Carrier in Development of Mucoadhesive Tablets Containing Polygoni cuspidati Extract with Potential for Dental Applications
Source: MDPI journal article supplement (doi:10.3390/pharmaceutics13111916), 2021-11-12
Supplement: s1 [file s1]

# Supplementary Materials: Cyclodextrin as functional carrier in development of mucoadhesive tablets containing *Polygoni cuspidati* extract with potential for dental applications

Magdalena Paczkowska-Walendowska, Emilia Szymańska, Katarzyna Winnicka, Dominik Szwajgier, Ewa Baranowska-Wójcik, Marek A. Ruchała, Marek Simon, Judyta Cielecka-Piontek

**Table S1.** Solid content of lyophilized extracts

| Lyophilized extract description | Solid content [%] |
|---------------------------------|-------------------|
| L1                              | 8.87              |
| L2                              | 22.08             |
| L3                              | 38.44             |
| L4                              | 6.68              |
| L5                              | 21.01             |
| L6                              | 16.32             |
| L7                              | 27.12             |
| L8                              | 97.62             |
| L9                              | 2.12              |
| L10                             | 5.51              |
| L11                             | 4.33              |

**Table S2.** Validation parameters

| Parameter                                               | RSV                             | Emodin            |
|---------------------------------------------------------|---------------------------------|-------------------|
| Linearity: $y = ax + b$                                 |                                 |                   |
| $a \pm S_a$                                             | $0.409 \pm 0.009$               | $0.297 \pm 0.003$ |
| $b \pm S_b$                                             | insignificant ( $\alpha=0.05$ ) |                   |
| Correlation coefficient ( $r$ )                         | 0.999                           | 0.999             |
| Range of linearity [ $\mu\text{g/mL}$ ]                 | 25.0–500.0                      | 25.0–500.0        |
| Intra-day precision, RSD (<5% required) = repeatability |                                 |                   |
| 0.4 [ $\mu\text{g/mL}$ ]                                | 0.354                           | 0.838             |
| 4.0 [ $\mu\text{g/mL}$ ]                                | 0.972                           | 1.659             |
| 40.0 [ $\mu\text{g/mL}$ ]                               | 0.579                           | 2.226             |
| Inter-day precision = reproducibility                   |                                 |                   |
| 0.4 [ $\mu\text{g/mL}$ ]                                | 0.919                           | 2.502             |
| 4.0 [ $\mu\text{g/mL}$ ]                                | 1.039                           | 0.831             |
| 40.0 [ $\mu\text{g/mL}$ ]                               | 1.264                           | 0.853             |
| Limit of detection (LOD) [ $\mu\text{g/mL}$ ]           | 31.84                           | 16.70             |
| Limit of quantification (LOQ) [ $\mu\text{g/mL}$ ]      | 96.47                           | 50.61             |

$S_a$  standard deviation of slope;  $S_b$  standard deviation of intercept,  $t$ , calculated values of Student's  $t$  test,  $t_{\alpha,f} = 2.228$  critical values of Student's test for degrees of freedom  $f = 10$  and significance level  $\alpha = 0.05$ .

**Table S3.** The content of resveratrol and emodin in prepared liquid and lyophilized extracts

| Liquid extract      |                               |                    | Lyophilized extract                |                                     |                    |
|---------------------|-------------------------------|--------------------|------------------------------------|-------------------------------------|--------------------|
| extract description | Content ± SD                  |                    | lyophilized extract<br>description | Content ± SD                        |                    |
|                     | [µg per 1g of plant material] |                    |                                    | [µg per 1mg of lyophilized extract] |                    |
|                     | RSV                           | emodin             |                                    | RSV                                 | emodin             |
| W1                  | 44.42 ± 14.26                 | 0.56 ± 0.14        | L1                                 | 3.52 ± 0.52                         | 0.07 ± 0.01        |
| W2                  | 279.60 ± 13.33                | 0.63 ± 0.58        | L2                                 | 1.08 ± 0.15                         | 0.02 ± 0.01        |
| W3                  | 200.93 ± 25.93                | 0.20 ± 0.08        | L3                                 | 0.59 ± 0.11                         | 0.03 ± 0.01        |
| W4                  | 13.25 ± 2.52                  | 3.84 ± 0.37        | L4                                 | 3.61 ± 0.23                         | 4.38 ± 0.48        |
| <b>W5</b>           | <b>297.40 ± 26.27</b>         | <b>3.42 ± 0.27</b> | <b>L5</b>                          | <b>1.87 ± 0.24</b>                  | <b>1.91 ± 0.20</b> |
| W6                  | 196.19 ± 23.37                | 1.95 ± 0.20        | L6                                 | 1.67 ± 0.24                         | 2.74 ± 0.49        |
| W7                  | 476.92 ± 52.80                | 36.79 ± 2.73       | L7                                 | 1.27 ± 0.09                         | 1.92 ± 0.12        |
| W8                  | 399.62 ± 24.42                | 141.57 ± 24.56     | L8                                 | 0.36 ± 0.01                         | 1.17 ± 0.43        |
| W9                  | 66.09 ± 12.24                 | 5.36 ± 0.89        | L9                                 | 2.25 ± 0.98                         | 5.72 ± 2.55        |
| W10                 | 434.60 ± 42.13                | 44.47 ± 23.28      | L10                                | 3.26 ± 0.37                         | 11.12 ± 1.48       |
| W11                 | 280.57 ± 25.58                | 32.01 ± 6.79       | L11                                | 2.18 ± 0.07                         | 10.55 ± 1.62       |
| W12                 | 401.18 ± 5.06                 | 353.88 ± 11.99     | -                                  | -                                   | -                  |
| W13                 | 446.11 ± 5.60                 | 364.37 ± 16.06     | -                                  | -                                   | -                  |
| W14                 | 402.23 ± 4.13                 | 342.19 ± 12.62     | -                                  | -                                   | -                  |

**Table S4.** Apparent permeability value  $P_{app}$  for resveratrol and emodin

| Liquid extract      |                                               |                                   | Lyophilized extract             |                                               |                                    |
|---------------------|-----------------------------------------------|-----------------------------------|---------------------------------|-----------------------------------------------|------------------------------------|
| extract description | $P_{app} \pm \text{SD} \times 10^{-6}$ [cm/s] |                                   | lyophilized extract description | $P_{app} \pm \text{SD} \times 10^{-6}$ [cm/s] |                                    |
|                     | RSV                                           | emodin                            |                                 | RSV                                           | emodin                             |
|                     | RSV                                           | emodin                            |                                 | RSV                                           | emodin                             |
| standards           | 7.34 $\pm$ 0.28                               | 7.42 $\pm$ 0.97                   | standards                       | 7.34 $\pm$ 0.28                               | 7.42 $\pm$ 0.97                    |
| W1                  | 15.71 $\pm$ 1.83                              | 13.19 $\pm$ 0.55                  | L1                              | 55.08 $\pm$ 0.45                              | 52.28 $\pm$ 0.49                   |
| W2                  | 32.93 $\pm$ 3.81                              | 13.47 $\pm$ 3.16                  | L2                              | 49.32 $\pm$ 5.70                              | 47.87 $\pm$ 1.09                   |
| W3                  | 63.73 $\pm$ 2.27                              | 9.06 $\pm$ 2.81                   | L3                              | 66.03 $\pm$ 5.42                              | 50.68 $\pm$ 4.23                   |
| W4                  | 55.00 $\pm$ 5.54                              | 8.03 $\pm$ 1.20                   | L4                              | 62.41 $\pm$ 3.49                              | 41.06 $\pm$ 3.39                   |
| <b>W5</b>           | <b>44.03 <math>\pm</math> 5.73</b>            | <b>7.62 <math>\pm</math> 3.17</b> | <b>L5</b>                       | <b>55.84 <math>\pm</math> 0.60</b>            | <b>38.19 <math>\pm</math> 2.98</b> |
| W6                  | 48.05 $\pm$ 2.46                              | 8.70 $\pm$ 1.55                   | L6                              | 50.56 $\pm$ 1.10                              | 44.46 $\pm$ 3.87                   |
| W7                  | 62.18 $\pm$ 5.86                              | 13.60 $\pm$ 0.24                  | L7                              | 59.38 $\pm$ 5.44                              | 41.55 $\pm$ 3.45                   |
| W8                  | 57.59 $\pm$ 4.33                              | 18.44 $\pm$ 1.02                  | L8                              | 59.09 $\pm$ 1.16                              | 53.98 $\pm$ 1.22                   |
| W9                  | 56.81 $\pm$ 3.84                              | 8.97 $\pm$ 0.83                   | L9                              | 45.06 $\pm$ 6.19                              | 45.75 $\pm$ 3.31                   |
| W10                 | 53.33 $\pm$ 5.93                              | 7.01 $\pm$ 0.61                   | L10                             | 44.60 $\pm$ 6.33                              | 29.29 $\pm$ 1.26                   |
| W11                 | 73.96 $\pm$ 1.80                              | 8.51 $\pm$ 0.54                   | L11                             | 49.02 $\pm$ 1.54                              | 18.61 $\pm$ 2.12                   |
| W12                 | 93.27 $\pm$ 3.54                              | 7.01 $\pm$ 0.89                   | -                               | -                                             | -                                  |
| W13                 | 80.03 $\pm$ 3.29                              | 8.31 $\pm$ 0.95                   | -                               | -                                             | -                                  |
| W14                 | 70.19 $\pm$ 4.60                              | 8.61 $\pm$ 0.97                   | -                               | -                                             | -                                  |

**Table S5.** The antioxidant effect of liquid extracts

| Liquid extract description | polyphenolic compounds content [GAE mg/1,0 g material] | DPPH IC <sub>50</sub> [μg/mL] | CUPRAC IC <sub>0.5</sub> [μg/mL] |
|----------------------------|--------------------------------------------------------|-------------------------------|----------------------------------|
| W1                         | 44.6                                                   | 0.19                          | 0.22                             |
| W2                         | 46.1                                                   | 0.28                          | 0.32                             |
| W3                         | 49.3                                                   | 0.25                          | 0.33                             |
| W4                         | 40.3                                                   | 0.22                          | 0.29                             |
| <b>W5</b>                  | <b>54.5</b>                                            | <b>0.16</b>                   | <b>0.27</b>                      |
| W6                         | 53.3                                                   | 0.26                          | 0.31                             |
| W7                         | 84.1                                                   | 0.24                          | 0.28                             |
| W8                         | 70.5                                                   | 0.22                          | 0.26                             |
| W9                         | 38.4                                                   | 0.21                          | 0.25                             |
| W10                        | 52.9                                                   | 0.16                          | 0.23                             |
| W11                        | 49.8                                                   | 0.27                          | 0.30                             |
| W12                        | 38.3                                                   | 0.38                          | 0.39                             |
| W13                        | 33.6                                                   | 0.29                          | 0.43                             |
| W14                        | 33.7                                                   | 0.42                          | 0.45                             |
| RSV                        |                                                        | 0.0257                        | 0.032                            |
| Vitamin C                  |                                                        | 0.0097                        | 0.010                            |
| emodin                     |                                                        | >4.0                          | >4.0                             |

**Table S6.** The antioxidant effect of lyophilized extracts

| Lyophilized extract description | DPPH IC <sub>50</sub> [μg/mL] | CUPRAC IC <sub>0.5</sub> [μg/mL] | FRAP Equivalent Trolox concentration [mg/mL] | HORAC Equivalent gallic acid concentration [μg/cm <sup>3</sup> ] | ORAC Equivalent Trolox concentration [μM/L] |
|---------------------------------|-------------------------------|----------------------------------|----------------------------------------------|------------------------------------------------------------------|---------------------------------------------|
| L1                              | 33.1                          | 12.9                             | 0.18 ± 0.01                                  | 351.1 ± 11.2                                                     | 29.4 ± 1.2                                  |
| L2                              | 73.1                          | 73.2                             | 0.18 ± 0.02                                  | <b>482.3 ± 18.3</b>                                              | 28.6 ± 3.1                                  |
| L3                              | 145.1                         | 137.1                            | 0.19 ± 0.02                                  | 475.0 ± 10.3                                                     | 30.5 ± 2.4                                  |
| L4                              | 35.1                          | 4.0                              | 0.20 ± 0.01                                  | 453.3 ± 8.2                                                      | 31.3 ± 2.0                                  |
| <b>L5</b>                       | <b>66.1</b>                   | <b>59.6</b>                      | <b>0.32 ± 0.03</b>                           | <b>481.3 ± 20.3</b>                                              | 35.6 ± 1.1                                  |
| L6                              | 83.1                          | 78.5                             | 0.23 ± 0.01                                  | 476.3 ± 21.0                                                     | <b>39.9 ± 1.9</b>                           |
| L7                              | 100.1                         | 96.8                             | 0.19 ± 0.04                                  | 476.5 ± 17.3                                                     | 27.6 ± 2.6                                  |
| L8                              | 190.1                         | 309.9                            | 0.16 ± 0.03                                  | <b>490.0 ± 26.3</b>                                              | 26.4 ± 0.8                                  |
| L9                              | 36.1                          | 33.8                             | 0.17 ± 0.10                                  | 431.6 ± 20.4                                                     | 23.4 ± 2.2                                  |
| L10                             | 44.1                          | 53.3                             | 0.20 ± 0.01                                  | 458.2 ± 16.3                                                     | 25.0 ± 1.4                                  |
| L11                             | 46.1                          | 49.7                             | 0.24 ± 0.02                                  | 463.4 ± 28.3                                                     | <b>42.4 ± 1.0</b>                           |
| RSV                             | 0.0257                        | 0.032                            |                                              |                                                                  |                                             |

|           |        |       |
|-----------|--------|-------|
| Vitamin C | 0.0097 | 0.010 |
| emodin    | >4.0   | >4.0  |

**Table S7.** Antioxidant activity of lyophilized extracts

| Effect on SOD activity          |                       | Effect on GR and GPx activity |                                      |                   |                                      | Linoleic acid oxidation                        | β-carotene oxidation                           |
|---------------------------------|-----------------------|-------------------------------|--------------------------------------|-------------------|--------------------------------------|------------------------------------------------|------------------------------------------------|
| Lyophilized extract description | Enzyme inhibition [%] | GR inhibition (%)             | GR inhibitory activity               | GPx inhibition    | GPx inhibitory activity              | Equivalent ascorbic acid concentration (mg/ml) | Equivalent ascorbic acid concentration (μg/ml) |
|                                 |                       |                               | (μmol consumed NADPH/min incubation) | (%)               | (nmol consumed NADPH/min incubation) |                                                |                                                |
| L1                              | 23.6 ± 2.5            | 56.8 ± 1.3                    | 2.2 ± 0.2                            | <b>66.2 ± 2.3</b> | 132.5 ± 4.6                          | 1.34 ± 0.15                                    | 27.0 ± 3.2                                     |
| L2                              | 24.8 ± 3.1            | 58.0 ± 3.2                    | 2.2 ± 0.2                            | 46.6 ± 1.5        | 92.9 ± 3.5                           | 1.64 ± 0.21                                    | 29.6 ± 2.1                                     |
| L3                              | 20.5 ± 2.0            | 60.1 ± 2.6                    | 2.3 ± 0.1                            | 53.3 ± 2.5        | 106.3 ± 4.2                          | 1.83 ± 0.04                                    | 28.4 ± 0.3                                     |
| L4                              | 21.4 ± 1.9            | 67.3 ± 3.0                    | 2.6 ± 0.1                            | 53.1 ± 4.6        | 105.9 ± 6.7                          | 2.05 ± 0.19                                    | 34.2 ± 3.3                                     |
| <b>L5</b>                       | <b>28.7 ± 3.0</b>     | <b>79.0 ± 2.8</b>             | 3.1 ± 0.2                            | <b>60.0 ± 5.2</b> | 119.6 ± 7.0                          | 2.56 ± 0.11                                    | 36.7 ± 4.2                                     |
| L6                              | <b>31.4 ± 4.0</b>     | <b>83.3 ± 2.5</b>             | 3.2 ± 0.2                            | 31.4 ± 3.2        | 62.6 ± 4.3                           | 2.01 ± 0.10                                    | 38.4 ± 1.3                                     |
| L7                              | 23.2 ± 2.2            | 65.7 ± 3.2                    | 2.6 ± 0.3                            | 16.9 ± 5.1        | 33.7 ± 7.0                           | 2.16 ± 0.09                                    | 27.1 ± 2.6                                     |
| L8                              | 20.2 ± 3.3            | 62.4 ± 1.8                    | 2.4 ± 0.3                            | 16.7 ± 4.2        | 33.4 ± 5.6                           | 1.99 ± 0.13                                    | 20.6 ± 0.9                                     |
| L9                              | 19.6 ± 3.9            | 65.4 ± 1.9                    | 2.6 ± 0.2                            | 25.4 ± 3.0        | 50.6 ± 4.9                           | 1.84 ± 0.25                                    | 28.5 ± 2.2                                     |
| L10                             | 27.5 ± 1.7            | 76.5 ± 2.2                    | 3.0 ± 0.1                            | 46.6 ± 2.4        | 92.9 ± 3.2                           | 2.21 ± 0.21                                    | 30.2 ± 2.0                                     |
| L11                             | <b>32.6 ± 2.3</b>     | <b>78.4 ± 2.9</b>             | 3.1 ± 0.1                            | 25.4 ± 3.1        | 50.6 ± 3.6                           | 2.11 ± 0.06                                    | 35.4 ± 1.6                                     |

Data expressed as mean ± SD; The best values in bold

**Table S8.** Effect on BChE activity

| Sample | Equivalent reference concentration [μg/mL] |              |           |           |              |
|--------|--------------------------------------------|--------------|-----------|-----------|--------------|
|        | neostigmine                                | magniflorine | donepezil | eserine   | rivastigmine |
| L1     | 3.6 ± 0.1                                  | 11.4 ± 0.1   | 2.1 ± 0.1 | 2.4 ± 0.1 | 18.7 ± 0.1   |
| L2     | 3.9 ± 0.1                                  | 12.6 ± 0.1   | 2.3 ± 0.1 | 2.6 ± 0.1 | 20.5 ± 0.0   |
| L3     | 1.4 ± 0.1                                  | 4.6 ± 0.1    | 0.8 ± 0.0 | 0.9 ± 0.0 | 7.5 ± 0.0    |
| L4     | 4.3 ± 0.1                                  | 13.7 ± 0.0   | 2.5 ± 0.1 | 2.8 ± 0.0 | 22.4 ± 0.1   |
| L5     | 3.2 ± 0.0                                  | 10.3 ± 0.1   | 1.9 ± 0.0 | 2.1 ± 0.1 | 16.8 ± 0.0   |
| L6     | 3.6 ± 0.1                                  | 11.4 ± 0.0   | 2.1 ± 0.1 | 2.4 ± 0.0 | 18.7 ± 0.0   |
| L7     | 1.4 ± 0.0                                  | 4.6 ± 0.0    | 0.8 ± 0.1 | 0.9 ± 0.1 | 7.5 ± 0.0    |
| L8     | 1.1 ± 0.0                                  | 3.5 ± 0.1    | 0.6 ± 0.1 | 0.7 ± 0.0 | 5.6 ± 0.1    |
| L9     | 2.9 ± 0.0                                  | 9.1 ± 0.1    | 1.7 ± 0.0 | 1.9 ± 0.0 | 14.9 ± 0.1   |
| L10    | 1.8 ± 0.1                                  | 5.7 ± 0.0    | 1.0 ± 0.1 | 1.2 ± 0.2 | 9.3 ± 0.2    |
| L11    | 2.2 ± 0.1                                  | 6.9 ± 0.0    | 1.2 ± 0.1 | 1.4 ± 0.1 | 11.2 ± 0.1   |

**Table S9.** Anti-inflammatory activity

| Sample | Equivalent acetylsalicylic acid concentration | COX-2 inhibition  |
|--------|-----------------------------------------------|-------------------|
|        | (mg/cm <sup>3</sup> )                         | [%]               |
| L1     | 3.26 ± 0.2                                    | 92.3 ± 4.3        |
| L2     | 3.24 ± 0.0                                    | 87.2 ± 3.2        |
| L3     | 3.15 ± 0.1                                    | 64.1 ± 2.4        |
| L4     | 3.27 ± 0.1                                    | <b>94.9 ± 2.1</b> |
| L5     | 3.24 ± 0.1                                    | 87.2 ± 1.6        |
| L6     | 3.29 ± 0.0                                    | <b>96.0 ± 4.2</b> |
| L7     | 2.99 ± 0.0                                    | 74.4 ± 3.3        |
| L8     | 3.00 ± 0.0                                    | 71.8 ± 2.0        |
| L9     | 3.24 ± 0.1                                    | 87.2 ± 3.5        |
| L10    | 3.26 ± 0.1                                    | <b>92.3 ± 4.1</b> |
| L11    | 3.24 ± 0.1                                    | 87.2 ± 3.2        |

**Table S10.** Mathematical characteristics of the resveratrol release kinetics from tablets F1-F6

| Formulation<br>n | Mathematical model |                |                     |                |                 |                |                          |                |       |
|------------------|--------------------|----------------|---------------------|----------------|-----------------|----------------|--------------------------|----------------|-------|
|                  | Zero-order kinetic |                | First-order kinetic |                | Higuchi kinetic |                | Korsmeyer-Peppas kinetic |                |       |
|                  | K                  | R <sup>2</sup> | K                   | R <sup>2</sup> | K               | R <sup>2</sup> | K                        | R <sup>2</sup> | n     |
| F1               | 3.99               | <b>0.943</b>   | 0.187               | 0.563          | 8.79            | 0.761          | 1.42                     | 0.895          | 0.593 |
| F2               | 3.11               | <b>0.922</b>   | 0.177               | 0.599          | 6.93            | 0.764          | 1.33                     | 0.921          | 0.554 |
| F3               | 2.66               | <b>0.899</b>   | 0.183               | 0.566          | 6.05            | 0.775          | 1.49                     | 0.811          | 0.544 |
| F4               | 4.29               | <b>0.992</b>   | 0.169               | 0.635          | 8.64            | 0.675          | 0.99                     | 0.978          | 0.548 |
| F5               | 4.13               | <b>0.995</b>   | 0.178               | 0.642          | 8.14            | 0.651          | 1.19                     | 0.949          | 0.554 |
| F6               | 2.95               | <b>0.997</b>   | 0.167               | 0.700          | 5.46            | 0.578          | 1.12                     | 0.926          | 0.489 |
